# Supplementary material
Source: PubMed Central journal article supplement (PMC11079612)
Supplement: NIHMS1987929-supplement-SI.pdf [file NIHMS1987929-supplement-SI.pdf]

# Supplemental Material: Imaging Local Diffusive Dynamics Using Diffusion Exchange Spectroscopy MRI

Dan Benjamini,<sup>1,\*</sup> Michal E. Komlosh,<sup>1,2</sup> and Peter J. Basser<sup>1</sup>

<sup>1</sup>*Section on Quantitative Imaging and Tissue Sciences, NICHD,  
National Institutes of Health, Bethesda, MD 20892, USA*

<sup>2</sup>*Center for Neuroscience and Regenerative Medicine,*

*The Henry M. Jackson Foundation for the Advancement of Military Medicine, Bethesda, MD 20892, USA*

## REGULARIZATION

After discretization, Eq. 2 from the main text can be written as

$$\mathbf{E} = \mathbf{K}\mathbf{F}\mathbf{K}', \quad (\text{S1})$$

and Eq. 4 as

$$\mathbf{F}^{(\alpha)} = \arg \min_{\mathbf{F} \geq 0} (\|\mathbf{K}\mathbf{F}\mathbf{K}' - \mathbf{E}\|_2^2 + \alpha \|\mathbf{F}\|_2^2). \quad (\text{S2})$$

The regularization parameter,  $\alpha$ , was chosen based on the S-curve method [1], which uses the fit error,  $\chi(\alpha) = \|\mathbf{K}\mathbf{F}^{(\alpha)}\mathbf{K}' - \mathbf{E}\|_2$ . The regularization parameter was determined such that  $d(\log \chi)/d(\log \alpha) = \text{TOL}$ , with  $\text{TOL} = 0.1$  [1], with  $\alpha$  in the range of  $10^{-5}$  to  $10^5$ .

## APPARENT DIFFUSION COEFFICIENT OF THE RESTRICTED COMPARTMENT

The method used in the main text yields the apparent diffusion coefficient of the restricted compartment,  $D_{rest}$ . This diffusivity is determined by a combination of the medium diffusion coefficient,  $D_0$ , the shape and the size of the restriction, and the diffusion-encoding experimental parameters. To establish the ground truth of  $D_I$  we consider the confinement geometry, the cylinder, and its nominal diameter,  $5 \mu\text{m}$ , as well as the diffusion time and the known water diffusivity. The Gaussian phase distribution (GPD) method [2] is a prevalent approach to approximate  $D_I^{GT}$ ; however, the DEXSY experiment requires that  $\tau_m \gg \Delta$  and, therefore, it was set as  $\Delta = 15$  ms. The GPD approximation is only valid when all diffusing spins have encountered boundaries many times, i.e.,  $\Delta \gg R^2/D_0$ ,  $R$  being the pore radius [3]. This condition is violated; thus the GPD method cannot be used. We therefore must estimate  $D_I$  without imposing any assumptions regarding the diffusion-encoding timing parameters. The multiple correlation function (MCF) approach [4] can be used to calculate the theoretical signal attenuation from water diffusing in a cylinder, with arbitrary experimental parameters. For completeness, we detail here the the derivation of the diffusion equation to a matrix formalism that enabled the approximation of  $D_{rest}$  [4].

The Bloch-Torrey Equation [5] describes the evolution of the transverse magnetization  $m(\mathbf{r}, t)$  with a diffusive component comprised of the Laplace operator and an encoding component comprised of the magnetic field  $B(\mathbf{r}, t)$ ,

$$\frac{\partial}{\partial t} m(\mathbf{r}, t) = D\nabla^2 m(\mathbf{r}, t) - i\gamma B(\mathbf{r}, t)m(\mathbf{r}, t). \quad (\text{S3})$$

This description neglects  $T_1$  and  $T_2$  relaxation of the spins. This equation is, in fact, the diffusion equation with an additional combined effect of diffusion in the presence of a varying magnetic field on the molecules. Note that here  $B(\mathbf{r}, t) = B_0 + f(t)(\mathbf{G} \cdot \mathbf{r})$  is the superposition of the constant magnetic field  $\mathbf{B}_0$  and the linear magnetic field gradient  $\mathbf{G}$ , with a dependence on time in the form of the temporal profile  $f(t)$  (i.e., the gradient waveform).

The Bloch-Torrey equation defines two influences on the magnetization—the diffusive migration of molecules and the magnetic field encoding. Therefore, there are two important length scales: the diffusion length  $\sqrt{DT}$ , which correlates to the average displacement of a molecule until the echo time  $T$ , and a gradient length  $(\gamma GT)^{-1}$  which correlates to the displacement of a molecule under a magnetic field gradient  $G$  that results in a phase spread of the order of  $2\pi$ . According to the two main length scales in the problem there is one dimensionless factor  $\sqrt{DT}\gamma GT$ . This is true for an unconfined geometry where the diffusion is free. For a restricting geometry, the typical size of the geometry  $L$  is introduced as a new dimensional parameter, thus creating two new dimensionless factors, which are defined as

$$p_1 = DT/L^2, \quad p_2 = \gamma GLT. \quad (\text{S4})$$

The Laplace operator  $\nabla^2$  can be represented by its set of eigenfunctions and eigenvalues, since it has a complete set of eigenfunctions for a bounded domain,  $\Omega$ . The problem is described by expressing the eigenvalues in dimensionless units as

$$\nabla^2 u_m(\mathbf{r}) + \frac{\lambda_m}{L^2} u_m(\mathbf{r}) = 0. \quad (\mathbf{r} \in \Omega) \quad (\text{S5})$$

Expressing the solution of Eq. S3 by the decomposition of the eigenfunctions results in

$$m(\mathbf{r}, t) = \sum_{m'} c_{m'}(t) u_{m'}(\mathbf{r}), \quad (\text{S6})$$

where  $c_{m'}(t)$  are unknown coefficients. Plugging Eq. S6

$$\frac{\partial}{\partial t} c_m(t) + \sum_{m'} \left( \frac{D\delta_{m,m'}\lambda_m}{L^2} + i\gamma \mathbf{G} L f(t) \int_{\Omega} d\mathbf{r} u_m^*(\mathbf{r}) \mathbf{r} u_{m'}(\mathbf{r}) \right) c_{m'}(t) = 0. \quad (\text{S7})$$

Note that  $B_{eff}(\mathbf{r}) = \frac{f(t)(\mathbf{G}\cdot\mathbf{r})}{L}$  is the effective, normalized and dimensionless magnetic field gradient (the additional multiplication by  $L$  compensates for the dimensionless factoring).  $f(t)$  is the temporal profile of the magnetic field. Since the static magnetic field  $\mathbf{B}_0$  generates a constant term in Eq. S3 and does not contribute to the evolution of the signal, it can be dropped out. Therefore,  $f(t)$  describes the temporal profile of the applied magnetic field gradients. The following infinite-dimensional matrices can be defined

$$\mathcal{B}_{m,m'} = \int_{\Omega} d\mathbf{r} u_m^*(\mathbf{r}) \mathbf{r} u_{m'}(\mathbf{r}), \quad (\text{S8})$$

$$\Lambda_{m,m'} = \delta_{m,m'} \lambda_m. \quad (\text{S9})$$

Multiplying Eq. S7 by  $T$  and plugging the dimensionless parameters  $p_1$  and  $p_2$  yields

$$T \frac{\partial}{\partial t} c_m(t) + \sum_{m'} \left( p_1 \Lambda_{m,m'} + i p_2 f(t) \mathcal{B}_{m,m'} \right) c_{m'}(t) = 0. \quad (\text{S10})$$

$c_m(t)$  can be considered as components of an infinite vector  $C(t)$  thus deriving a matricial first-order differential equation

$$T \frac{d}{dt} C(t) = - \left( p_1 \Lambda + i p_2 f(t) \mathcal{B} \right) C(t), \quad (\text{S11})$$

for which the solution is

$$C(t) = e^{-(p_1 \Lambda + i p_2 f(t) \mathcal{B}) t/T} C(0). \quad (\text{S12})$$

Before deriving the macroscopic NMR signal, consider that at  $t = 0$  the magnetization is uniform over  $\Omega$ . Thus, if  $V$  is the volume of  $\Omega$  then the initial condition is

$$m(\mathbf{r}, t = 0) = \frac{1}{V}. \quad (\text{S13})$$

in to Eq. S3, using Eq. S5, multiplying the equation by  $u_m^*(\mathbf{r})$ , and integrating over  $\Omega$  gives a set of differential equations

Note that  $u_0^*(\mathbf{r}) = V^{-1/2}$ , thus  $m(\mathbf{r}, t = 0) = V^{-1/2} u_0^*$ . Applying the initial condition on Eq. S6 yields

$$C(0) = V^{-1/2} \delta_{m,o}. \quad (\text{S14})$$

The NMR signal is determined by the transverse magnetization  $m(\mathbf{r}, t)$ ; therefore, the signal at the echo time  $T$  can be expressed by integrating  $m(\mathbf{r}, T)$  over the confined volume  $\Omega$

$$E = \int d\mathbf{r} m(\mathbf{r}, T). \quad (\text{S15})$$

Plugging Eq. S6 in to Eq. S15 and multiplying by  $u_0^*(\mathbf{r})$  yields

$$E = \int d\mathbf{r} m(\mathbf{r}, T) = V^{1/2} \sum_{m'} c_{m'}(T) \times \int_{\Omega} d\mathbf{r} u_{m'}(\mathbf{r}) u_0^*(\mathbf{r}) = V^{1/2} c_0(T). \quad (\text{S16})$$

It can be seen that the macroscopic signal depends only on the state that corresponds to  $u_0$ , and, together with Eq. S14, the signal is the first diagonal element of the matrix

$$E = \left[ e^{-(p_1 \Lambda + i p_2 f(t) \mathcal{B})} \right]_{0,0}. \quad (\text{S17})$$

This is true for  $f(t) = \mathbf{const}$ , but if the temporal profile is not constant, a numerical approximation is needed. Dividing  $T$  into a  $K$  number of equal intervals of duration  $\tau = T/K$  yields

$$E = \left[ \prod_{k=0}^{K-1} e^{-\tau(p_1 \Lambda + i p_2 f(\frac{k}{K} T) \mathcal{B})} \right]_{0,0}. \quad (\text{S18})$$

The matrices  $\Lambda$  and  $\mathcal{B}$  depend on the confining geometry, and can be calculated for several well-defined geometries. For a cylindrical geometry, they are given by Grebenkov [4].

To estimate  $D_I^{GT}$ , we first compute the signal attenuation from Eq. S18 with  $L = R$ ,  $T = \Delta + \delta$ ,  $D = D_0$ , and  $f(t)$  is the piecewise-constant profile of an SDE gradient waveform, denoted as  $E_I$ . We then find  $D_I$  that solves the problem

$$D_I^{GT} = \arg \min_{D_I} \|e^{-q^2 \Delta D_I} - E_I\|_2^2 \quad (\text{S19})$$

- [1] E. Fordham, A. Sezginer, and L. Hall, *Journal of Magnetic Resonance, Series A* **113**, 139 (1995).
- [2] C. H. Neuman, *The Journal of Chemical Physics* **60**, 4508 (1974).
- [3] D. A. Yablonskiy and A. L. Sukstanskii, *NMR in Biomedicine* **23**, 661 (2010).
- [4] D. S. Grebenkov, *Concepts in Magnetic Resonance Part A* **32A**, 277 (2008).
- [5] H. C. Torrey, *Physical Review* **104**, 563 (1956).

---

\* Corresponding author: dan.benjamini@nih.gov
